# Supplementary material
Source: HighWire-hosted journal article supplement (http://www.qdcxjkg.com/highwire/filestream/113782/field_highwire_adjunct_files/0/Online_supp_ERJ_V2_4-1-13.pdf)
Supplement: Online_supp_ERJ_V2_4-1-13.pdf [file Online_supp_ERJ_V2_4-1-13.pdf]

Lung function indices for predicting mortality in chronic obstructive pulmonary disease – online supplement

Afroditi K. Boutou,<sup>1,2</sup> Dinesh Shrikrishna<sup>1</sup>, Rebecca J. Tanner,<sup>1</sup> Cayley Smith,<sup>1</sup> Julia L. Kelly,<sup>1</sup> Simon P. Ward,<sup>1</sup> Michael I. Polkey,<sup>1</sup> Nicholas S. Hopkinson<sup>1</sup>

1) NIHR Respiratory Biomedical Research Unit at Royal Brompton and Harefield NHS Foundation Trust and Imperial College, London, UK

2) Respiratory Failure Unit, Papanikolaou General Hospital, Aristotle University of Thessaloniki, Thessaloniki, Greece

**Corresponding Author:** Nicholas S Hopkinson

NIHR Respiratory Biomedical Research Unit, Royal Brompton and Harefield NHS Foundation Trust and Imperial College, Fulham Rd. London SW3 6NP, UK.

Tel +44 2073497775 Fax +44 2073497778

[n.hopkinson@ic.ac.uk](mailto:n.hopkinson@ic.ac.uk)

## **RESULTS**

Additional analyses are presented below to complement those in the main paper.

Survival in the population excluding patients on long term oxygen therapy (Table E1, E2) again showed that diffusion capacity is the most powerful predictor of survival.

**Table E1.** Demographic and clinical characteristics of the COPD population, after excluding those on long term oxygen therapy (n=501)

|                               |            |
|-------------------------------|------------|
| Age (years)                   | 61.9±9.7   |
| Sex (%)                       |            |
| Male                          | 65.1       |
| Female                        | 34.9       |
| BMI (kg/m <sup>2</sup> )      | 24.2±5.1   |
| FEV <sub>1</sub> (%predicted) | 38.4±18.7  |
| FVC (%predicted)              | 86.5±22.3  |
| FEV1/FVC                      | 35.1±12.6  |
| GOLD classification (%)       |            |
| Stage I                       | 2.8        |
| Stage II                      | 20.7       |
| Stage III                     | 34.5       |
| Stage IV                      | 41.9       |
| TLC (%predicted)              | 125.1±18.8 |
| RV (%predicted)               | 202.3±58.8 |
| IC/TLC (%)                    | 26.7±8.9   |
| FRC (% predicted)             | 171.8±39.9 |
| DLco (%predicted)             | 42.1±17.6  |
| PaO <sub>2</sub> (KPa)        | 9.6±1.3    |
| PaCO <sub>2</sub> (KPa)       | 5.2±0.8    |
| (A-a) gradient (KPa)          | 4.9±1.3    |
| LTOT (%)                      | 17.1       |
| Smoking status (%)            |            |
| Never or Ex smokers           | 85.7       |
| Current smokers               | 14.3       |
| Pack-years                    | 43.7±21.1  |

| Exacerbations (%) |      |      |
|-------------------|------|------|
| 0-1/year          | 41.6 |      |
| 2-4/year          | 39.7 | BMI: |
| >4/year           | 18.8 | Body |

Mass Index; FEV<sub>1</sub>: Forced Expiratory Volume in 1 second; FVC: Forced Vital Capacity; GOLD: Global Initiative for Obstructive Lung disease; TLC: Total Lung Capacity; RV: Residual Volume; IC: Inspiratory Capacity; FRC: Functional Residual Capacity; DLco: Carbon Monoxide Diffusion Capacity; PaO<sub>2</sub>: arterial Oxygen Partial Pressure; PaCO<sub>2</sub>: arterial Carbon Dioxide Partial Pressure; (A-a) gradient: alveolar-arterial Oxygen gradient; LTOT: Long Term Oxygen Treatment

**Table E2.** Predictors of mortality in the COPD population after excluding patients under LTOT, according to the multivariate Cox regression analysis.

|                          | HR        | 95% CI      | <i>p</i> |
|--------------------------|-----------|-------------|----------|
| Age                      | 1.035     | 1.007-1.065 | 0.016    |
| PaO <sub>2</sub>         | 0.831     | 0.700-0.938 | 0.036    |
| DLco %predicted          |           |             | 0.041    |
| Best quartile (>53.95)   | 0.337     | 0.159-0.717 | 0.005    |
| Quartile 2 (53.95-39.05) | 0.545     | 0.315-0.942 | 0.030    |
| Quartile 3 (39.05-30.05) | 0.790     | 0.503-1.239 | 0.304    |
| Quartile 4 (<30.05)      | reference | reference   | -        |
| GOLD stages              |           |             | 0.637    |
| Stage I                  | 1.048     | 0.511-5.046 | 0.968    |
| Stage II                 | 0.594     | 0.173-2.039 | 0.408    |
| Stage III                | 0.764     | 0.408-1.431 | 0.401    |
| Stage IV                 | reference | reference   | -        |
| FVC %predicted           | 0.979     | 0.955-1.004 | 0.093    |
| FEV <sub>1</sub> /FVC    | 1.006     | 0.971-1.042 | 0.741    |
| RV %predicted            | 0.988     | 0.973-1.003 | 0.127    |
| FRC %predicted           | 1.026     | 0.998-1.054 | 0.068    |
| TLC %predicted           | 1.009     | 0.971-1.048 | 0.645    |
| IC/TLC                   | 2.009     | 0.275-3.343 | 0.246    |
| PaCO <sub>2</sub>        | 0.909     | 0.684-1.208 | 0.510    |
| BMI                      | 0.995     | 0.954-1.037 | 0.807    |

PaO<sub>2</sub>: arterial Oxygen Partial Pressure; DLco; Carbon Monoxide Diffusion Capacity;  
FVC: Forced Vital Capacity; FEV<sub>1</sub>: Forced Expiratory Volume in 1 second; RV:  
Residual Volume; FRC: Functional Residual Capacity; TLC: Total Lung Capacity; IC:  
Inspiratory Capacity; PaCO<sub>2</sub>: arterial Carbon Dioxide Partial Pressure; BMI: Body  
Mass Index

**Figure E1**

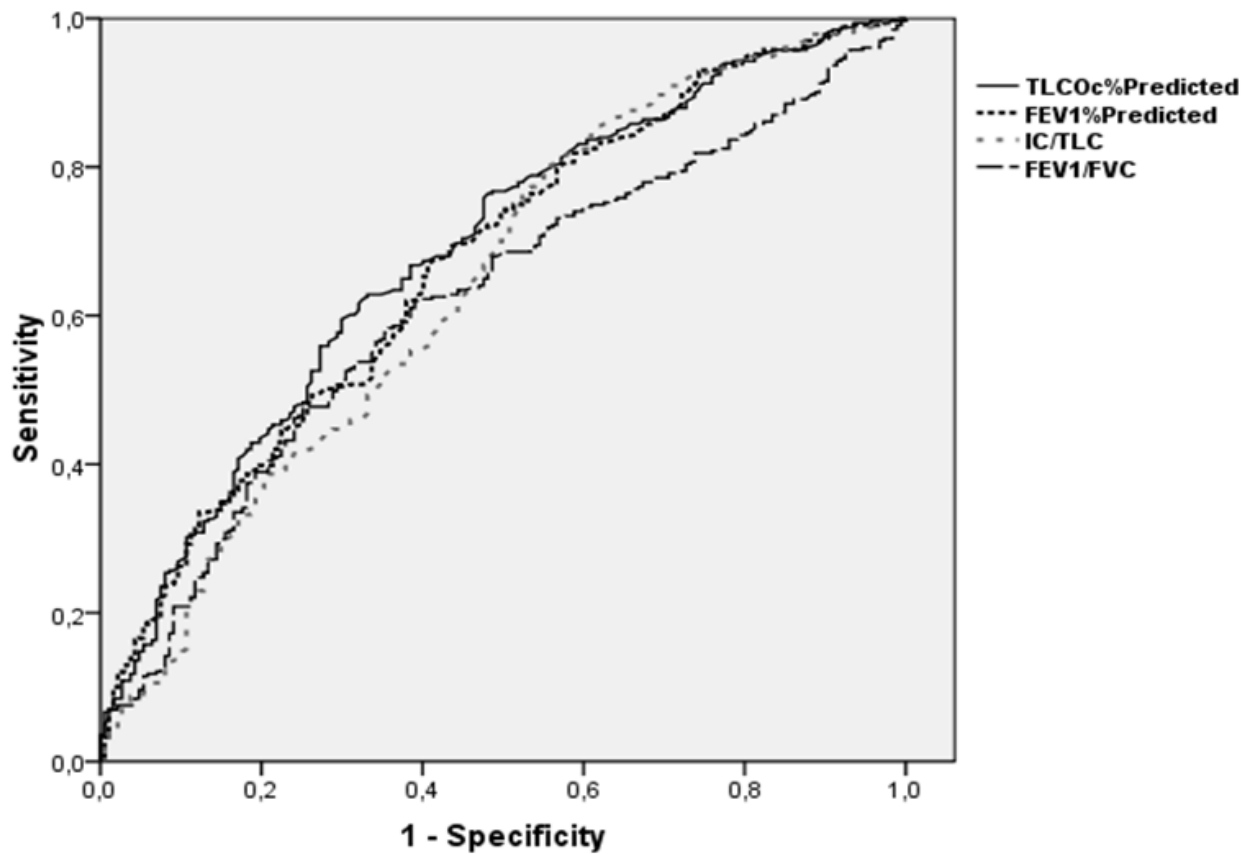

**Figure E1** Receiver operating curves comparing predictive power for survival in COPD patients of lung function parameters. Area under the curve for carbon monoxide gas transfer (DLco) 0.69; Forced expiratory volume in one second (FEV<sub>1</sub>) %predicted 0.67; inspiratory capacity to total lung capacity ratio (IC/TLC) 0.64 and FEV<sub>1</sub>/FVC ratio 0.62.
